# Supplementary material
Source: HighWire-hosted journal article supplement (https://bmjopen.bmj.com/content/9/6/e025332)
Supplement: inline-supplementary-material-2 [file inline-supplementary-material-2.pdf]

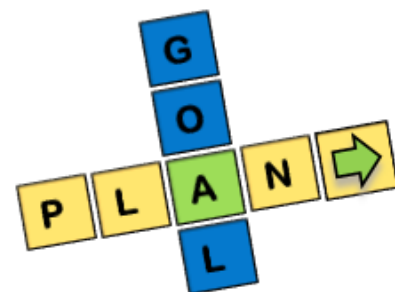

|                                                         |                                         |                                            |                          |
|---------------------------------------------------------|-----------------------------------------|--------------------------------------------|--------------------------|
| <b>Goal 1:</b>                                          |                                         |                                            | Tick                     |
| <b>At Baseline</b>                                      | With respect to this goal do they have? | Some attainment                            | <input type="checkbox"/> |
|                                                         |                                         | No attainment<br>(as bad as they could be) | <input type="checkbox"/> |
| <b>At 6 month review:</b><br><br>Was the goal attained? | <b>Yes</b>                              | A lot more                                 | <input type="checkbox"/> |
|                                                         |                                         | A little more                              | <input type="checkbox"/> |
|                                                         |                                         | As expected                                | <input type="checkbox"/> |
|                                                         | <b>No</b>                               | Partially attained                         | <input type="checkbox"/> |
|                                                         |                                         | No change                                  | <input type="checkbox"/> |
|                                                         |                                         | Got worse                                  | <input type="checkbox"/> |

PTO for further goals

|                                                         |                                                                                               |                                            |                          |
|---------------------------------------------------------|-----------------------------------------------------------------------------------------------|--------------------------------------------|--------------------------|
| <b>Goal 2:</b>                                          |                                                                                               |                                            | <b>Tick</b>              |
| <b>At Baseline</b>                                      | With respect to this goal do they have?                                                       | Some attainment                            | <input type="checkbox"/> |
|                                                         |                                                                                               | No attainment<br>(as bad as they could be) | <input type="checkbox"/> |
|                                                         |                                                                                               |                                            |                          |
| <b>At 6 month review:</b><br><br>Was the goal attained? | <b>Yes</b> 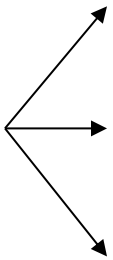  | A lot more                                 | <input type="checkbox"/> |
|                                                         |                                                                                               | A little more                              | <input type="checkbox"/> |
|                                                         |                                                                                               | As expected                                | <input type="checkbox"/> |
|                                                         | <b>No</b>  | Partially attained                         | <input type="checkbox"/> |
|                                                         |                                                                                               | No change                                  | <input type="checkbox"/> |
|                                                         |                                                                                               | Got worse                                  | <input type="checkbox"/> |

PTO for further goals

|                                                         |                                                                                               |                                            |                          |
|---------------------------------------------------------|-----------------------------------------------------------------------------------------------|--------------------------------------------|--------------------------|
| <b>Goal 3:</b>                                          |                                                                                               |                                            | <b>Tick</b>              |
| <b>At Baseline</b>                                      | With respect to this goal do they have?                                                       | Some attainment                            | <input type="checkbox"/> |
|                                                         |                                                                                               | No attainment<br>(as bad as they could be) | <input type="checkbox"/> |
|                                                         |                                                                                               |                                            |                          |
| <b>At 6 month review:</b><br><br>Was the goal attained? | <b>Yes</b> 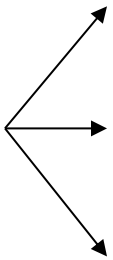  | A lot more                                 | <input type="checkbox"/> |
|                                                         |                                                                                               | A little more                              | <input type="checkbox"/> |
|                                                         |                                                                                               | As expected                                | <input type="checkbox"/> |
|                                                         | <b>No</b>  | Partially attained                         | <input type="checkbox"/> |
|                                                         |                                                                                               | No change                                  | <input type="checkbox"/> |
|                                                         |                                                                                               | Got worse                                  | <input type="checkbox"/> |
